# Supplementary material
Source: PubMed Central journal article supplement (PMC4370183)
Supplement: NIHMS667039-supplement-1.pdf [file NIHMS667039-supplement-1.pdf]

## Supplementary Table 1

**Title:** Effect of patient navigation on colorectal cancer screening in a community-based randomized controlled trial of urban African American adults

**Journal:** Cancer Causes and Control

**Authors and Affiliations:** Hisani N. Horne<sup>1</sup>, Darcy F. Phelan-Emrick<sup>2</sup>, Craig E. Pollack<sup>2,3</sup>, Diane Markakis<sup>2</sup>, Jennifer Wenzel<sup>4,5</sup>, Saifuddin Ahmed<sup>6</sup>, Mary A. Garza<sup>7</sup>, Gary R. Shapiro<sup>8</sup>, Lee R. Bone<sup>9</sup>, Lawrence B. Johnson<sup>10</sup>, Jean G. Ford<sup>11</sup>

<sup>1</sup>Cancer Prevention Fellowship Program, Division of Cancer Prevention, National Cancer Institute, National Institutes of Health, Rockville, MD, <sup>2</sup>Department of Epidemiology, Johns Hopkins Bloomberg School of Public Health, <sup>3</sup>Department of General Internal Medicine, Johns Hopkins School of Medicine, Baltimore, MD, <sup>4</sup>Department of Oncology, Johns Hopkins School of Medicine and Department of Acute and Chronic Care, <sup>5</sup>Johns Hopkins University School of Nursing, Baltimore, MD, <sup>6</sup>Department of Population, Family and Reproductive Health and Department of Biostatistics, Johns Hopkins Bloomberg School of Public Health, Baltimore, MD, <sup>7</sup>Department of Behavioral and Community Health, School of Public Health, University of Maryland College Park, College Park, MD, <sup>8</sup>Health Partners Cancer Program and Institute for Education and Research, Minneapolis, MN, <sup>9</sup>Department of Health, Behavior and Society, Johns Hopkins Bloomberg School of Public Health, Baltimore, MD, <sup>10</sup>Park West Health Systems, Baltimore, MD, and <sup>11</sup>The Brooklyn Hospital Center, Brooklyn, NY

### Correspondence to:

Hisani N. Horne  
[hisani.horne@nih.gov](mailto:hisani.horne@nih.gov)

Supplementary Table 1

| <b>Supplementary Table 1:</b> Comparing characteristics of participants included in the study and those lost to follow-up, for the entire population and stratified by intervention group |                                              |                                   |        |                                             |                                   |      |                                             |                                   |       |
|-------------------------------------------------------------------------------------------------------------------------------------------------------------------------------------------|----------------------------------------------|-----------------------------------|--------|---------------------------------------------|-----------------------------------|------|---------------------------------------------|-----------------------------------|-------|
| Variable                                                                                                                                                                                  | All Participants                             |                                   |        | Control Group Only                          |                                   |      | Patient Navigation Group Only               |                                   |       |
|                                                                                                                                                                                           | Completed<br>Exit<br>Interview<br>(N = 1220) | Lost to<br>follow-up<br>(N = 471) | P      | Completed<br>Exit<br>Interview<br>(N = 642) | Lost to<br>follow-up<br>(N = 192) | P    | Completed<br>Exit<br>Interview<br>(N = 578) | Lost to<br>follow-up<br>(N = 279) | P     |
|                                                                                                                                                                                           | N (%)                                        | N (%)                             |        | N (%)                                       | N (%)                             |      | N (%)                                       | N (%)                             |       |
| Age Group                                                                                                                                                                                 |                                              |                                   |        |                                             |                                   |      |                                             |                                   |       |
| 65-69                                                                                                                                                                                     | 611 (50.1)                                   | 232 (49.3)                        | 0.76   | 323 (50.3)                                  | 90 (46.9)                         | 0.40 | 288 (49.8)                                  | 142 (50.9)                        | 0.77  |
| 70-75                                                                                                                                                                                     | 609 (49.9)                                   | 239 (50.7)                        |        | 319 (49.7)                                  | 102 (53.1)                        |      | 290 (50.2)                                  | 137 (49.1)                        |       |
| Gender                                                                                                                                                                                    |                                              |                                   |        |                                             |                                   |      |                                             |                                   |       |
| Male                                                                                                                                                                                      | 335 (27.5)                                   | 170 (36.1)                        | 0.001  | 178 (27.7)                                  | 71 (37.0)                         | 0.01 | 157 (27.2)                                  | 99 (35.5)                         | 0.01  |
| Female                                                                                                                                                                                    | 885 (72.5)                                   | 301 (63.9)                        |        | 464 (72.3)                                  | 121 (63.0)                        |      | 421 (72.8)                                  | 180 (64.5)                        |       |
| Education                                                                                                                                                                                 |                                              |                                   |        |                                             |                                   |      |                                             |                                   |       |
| ≤ High school diploma                                                                                                                                                                     | 687 (56.3)                                   | 299 (63.5)                        | 0.01   | 374 (58.3)                                  | 132 (68.7)                        | 0.01 | 313 (54.1)                                  | 167 (59.9)                        | 0.11  |
| >High school diploma                                                                                                                                                                      | 531 (43.5)                                   | 170 (36.1)                        |        | 267 (41.6)                                  | 59 (30.7)                         |      | 264 (45.7)                                  | 111 (39.8)                        |       |
| Income                                                                                                                                                                                    |                                              |                                   |        |                                             |                                   |      |                                             |                                   |       |
| <\$9,999                                                                                                                                                                                  | 197 (16.1)                                   | 115 (24.4)                        | <0.001 | 109 (17.0)                                  | 50 (26.0)                         | 0.01 | 88 (15.2)                                   | 65 (23.3)                         | 0.002 |
| \$10,000 - \$19,999                                                                                                                                                                       | 273 (22.4)                                   | 107 (22.7)                        |        | 151 (23.5)                                  | 45 (23.4)                         |      | 122 (21.1)                                  | 62 (22.2)                         |       |
| \$20,000 - \$29,000                                                                                                                                                                       | 215 (17.6)                                   | 66 (14.0)                         |        | 116 (18.1)                                  | 25 (13.0)                         |      | 99 (17.1)                                   | 41 (14.7)                         |       |
| >\$30,000                                                                                                                                                                                 | 345 (28.3)                                   | 95 (20.2)                         |        | 175 (27.3)                                  | 41 (21.3)                         |      | 170 (29.4)                                  | 54 (19.3)                         |       |
| Health Perception                                                                                                                                                                         |                                              |                                   |        |                                             |                                   |      |                                             |                                   |       |
| Fair/Poor                                                                                                                                                                                 | 268 (22.0)                                   | 121 (25.7)                        | 0.10   | 140 (21.8)                                  | 54 (28.1)                         | 0.10 | 128 (22.2)                                  | 67 (24.0)                         | 0.54  |
| Good/Very Good/Excellent                                                                                                                                                                  | 952 (78.0)                                   | 350 (74.3)                        |        | 502 (78.2)                                  | 138 (71.9)                        |      | 450 (77.8)                                  | 212 (76.0)                        |       |
| Family History of CRC                                                                                                                                                                     |                                              |                                   |        |                                             |                                   |      |                                             |                                   |       |
| No                                                                                                                                                                                        | 1,006 (85.1)                                 | 388 (86.8)                        | 0.59   | 528 (82.2)                                  | 154 (80.2)                        | 0.68 | 478 (82.7)                                  | 234 (83.9)                        | 0.60  |
| Yes                                                                                                                                                                                       | 176 (14.9)                                   | 59 (13.2)                         |        | 91 (14.2)                                   | 24 (12.5)                         |      | 84 (14.5)                                   | 35 (12.5)                         |       |
| Co-morbidities                                                                                                                                                                            |                                              |                                   |        |                                             |                                   |      |                                             |                                   |       |
| < 3                                                                                                                                                                                       | 645 (52.9)                                   | 247 (52.4)                        | 0.87   | 337 (52.5)                                  | 98 (51.0)                         | 0.72 | 308 (53.3)                                  | 149 (53.4)                        | 0.97  |
| ≥ 3                                                                                                                                                                                       | 575 (47.1)                                   | 224 (47.6)                        |        | 305 (47.5)                                  | 94 (49.0)                         |      | 270 (46.7)                                  | 130 (46.6)                        |       |
| Body Mass Index (BMI, kg/m <sup>2</sup> )                                                                                                                                                 |                                              |                                   |        |                                             |                                   |      |                                             |                                   |       |
| Normal (<25)                                                                                                                                                                              | 192 (15.7)                                   | 82 (17.4)                         | 0.03   | 96 (14.9)                                   | 30 (15.6)                         | 0.84 | 96 (16.6)                                   | 52 (18.6)                         | 0.01  |

Supplementary Table 1

|                                                                                                                                                                                                                                                                                                                                                                           |              |            |      |            |            |      |            |            |      |
|---------------------------------------------------------------------------------------------------------------------------------------------------------------------------------------------------------------------------------------------------------------------------------------------------------------------------------------------------------------------------|--------------|------------|------|------------|------------|------|------------|------------|------|
| Overweight (25 - <30)                                                                                                                                                                                                                                                                                                                                                     | 388 (31.8)   | 156 (33.1) |      | 216 (33.6) | 56 (29.2)  |      | 172 (29.8) | 100 (35.8) |      |
| Obese Class I (30 - <35)                                                                                                                                                                                                                                                                                                                                                  | 290 (23.8)   | 99 (21.0)  |      | 144 (22.4) | 40 (20.8)  |      | 146 (25.3) | 59 (21.1)  |      |
| Obese Class II (≥35)                                                                                                                                                                                                                                                                                                                                                      | 285 (23.4)   | 75 (15.9)  |      | 150 (23.4) | 37 (19.3)  |      | 135 (23.4) | 38 (13.6)  |      |
| Smoking Status                                                                                                                                                                                                                                                                                                                                                            |              |            |      |            |            |      |            |            |      |
| Never                                                                                                                                                                                                                                                                                                                                                                     | 478 (39.2)   | 156 (33.1) | 0.03 | 243 (37.8) | 66 (34.4)  | 0.09 | 235 (40.7) | 90 (32.3)  | 0.12 |
| Former                                                                                                                                                                                                                                                                                                                                                                    | 483 (39.6)   | 162 (34.4) |      | 265 (41.3) | 60 (31.2)  |      | 218 (37.7) | 102 (36.6) |      |
| Current                                                                                                                                                                                                                                                                                                                                                                   | 184 (15.1)   | 89 (18.9)  |      | 94 (14.6)  | 36 (18.7)  |      | 90 (15.6)  | 53 (19.0)  |      |
| Level of Health Literacy                                                                                                                                                                                                                                                                                                                                                  |              |            |      |            |            |      |            |            |      |
| Low                                                                                                                                                                                                                                                                                                                                                                       | 544 (44.6)   | 210 (44.6) | 0.09 | 276 (43.0) | 83 (43.2)  | 0.12 | 268 (46.4) | 127 (45.5) | 0.45 |
| Adequate                                                                                                                                                                                                                                                                                                                                                                  | 599 (49.1)   | 190 (40.3) |      | 324 (50.5) | 74 (38.5)  |      | 275 (47.6) | 116 (41.6) |      |
| Up-to-date with CRC Screening at Baseline <sup>b</sup>                                                                                                                                                                                                                                                                                                                    |              |            |      |            |            |      |            |            |      |
| Yes                                                                                                                                                                                                                                                                                                                                                                       | 1,003 (82.2) | 366 (77.7) | 0.03 | 527 (82.1) | 150 (78.1) | 0.22 | 476 (82.3) | 216 (77.4) | 0.08 |
| No                                                                                                                                                                                                                                                                                                                                                                        | 216 (17.7)   | 105 (22.3) |      | 115 (17.9) | 42 (21.9)  |      | 101 (17.5) | 63 (22.6)  |      |
| Abbreviations: CRC, colorectal cancer. <sup>a</sup> P-value calculated using Pearson's chi-squared tests. <sup>b</sup> Up-to-date with CRC screening defined as self-reported FOBT within a year of date of randomization or colonoscopy/sigmoidoscopy within 10-years of date of randomization. Note: Column percentages that do not equal 100% are due to missing data. |              |            |      |            |            |      |            |            |      |
