# Supplementary material
Source: PubMed Central journal article supplement (PMC4370183)
Supplement: NIHMS667039-supplement-2.pdf [file NIHMS667039-supplement-2.pdf]

Supplementary Table 2

**Title:** Effect of patient navigation on colorectal cancer screening in a community-based randomized controlled trial of urban African American adults

**Journal:** Cancer Causes and Control

**Authors and Affiliations:** Hisani N. Horne<sup>1</sup>, Darcy F. Phelan-Emrick<sup>2</sup>, Craig E. Pollack<sup>2,3</sup>, Diane Markakis<sup>2</sup>, Jennifer Wenzel<sup>4,5</sup>, Saifuddin Ahmed<sup>6</sup>, Mary A. Garza<sup>7</sup>, Gary R. Shapiro<sup>8</sup>, Lee R. Bone<sup>9</sup>, Lawrence B. Johnson<sup>10</sup>, Jean G. Ford<sup>11</sup>

<sup>1</sup>Cancer Prevention Fellowship Program, Division of Cancer Prevention, National Cancer Institute, National Institutes of Health, Rockville, MD, <sup>2</sup>Department of Epidemiology, Johns Hopkins Bloomberg School of Public Health, <sup>3</sup>Department of General Internal Medicine, Johns Hopkins School of Medicine, Baltimore, MD, <sup>4</sup>Department of Oncology, Johns Hopkins School of Medicine and Department of Acute and Chronic Care, <sup>5</sup>Johns Hopkins University School of Nursing, Baltimore, MD, <sup>6</sup>Department of Population, Family and Reproductive Health and Department of Biostatistics, Johns Hopkins Bloomberg School of Public Health, Baltimore, MD, <sup>7</sup>Department of Behavioral and Community Health, School of Public Health, University of Maryland College Park, College Park, MD, <sup>8</sup>Health Partners Cancer Program and Institute for Education and Research, Minneapolis, MN, <sup>9</sup>Department of Health, Behavior and Society, Johns Hopkins Bloomberg School of Public Health, Baltimore, MD, <sup>10</sup>Park West Health Systems, Baltimore, MD, and <sup>11</sup>The Brooklyn Hospital Center, Brooklyn, NY

**Correspondence to:**

Hisani N. Horne  
[hisani.horne@nih.gov](mailto:hisani.horne@nih.gov)

Supplementary Table 2

| <b>Supplementary Table 2.</b> Adjusted odds ratios (OR) for being up-to-date with colorectal cancer screening at the first annual follow-up interview among study participants |                                |             |                                     |                   |                                |                   |
|--------------------------------------------------------------------------------------------------------------------------------------------------------------------------------|--------------------------------|-------------|-------------------------------------|-------------------|--------------------------------|-------------------|
| <b>Predictor Variable</b>                                                                                                                                                      | <b>Any CRC Screening</b>       |             | <b>Colonoscopy or Sigmoidoscopy</b> |                   | <b>FOBT</b>                    |                   |
|                                                                                                                                                                                | <b>OR<sup>a</sup> (95% CI)</b> | <b>P</b>    | <b>OR<sup>a</sup> (95% CI)</b>      | <b>P</b>          | <b>OR<sup>a</sup> (95% CI)</b> | <b>P</b>          |
| <b>Intervention</b>                                                                                                                                                            |                                |             |                                     |                   |                                |                   |
| Control, PEM (ref)                                                                                                                                                             | 1.00                           |             | 1.00                                |                   | 1.00                           |                   |
| Patient Navigation + PEM                                                                                                                                                       | 1.20 (0.98 – 1.47)             | 0.08        | 1.47 (1.17 – 1.84)                  | <b>0.001</b>      | 1.15 (0.92 – 1.43)             | 0.21              |
| <b>Gender</b>                                                                                                                                                                  |                                |             |                                     |                   |                                |                   |
| Male (ref)                                                                                                                                                                     | 1.00                           |             | 1.00                                |                   | 1.00                           |                   |
| Female                                                                                                                                                                         | 0.73 (0.58 – 0.92)             | <b>0.01</b> | 0.90 (0.70 – 1.15)                  | 0.39              | 0.64 (0.51 – 0.82)             | <b>&lt;0.0001</b> |
| <b>Age</b>                                                                                                                                                                     |                                |             |                                     |                   |                                |                   |
| 65-69 (ref)                                                                                                                                                                    | 1.00                           |             | 1.00                                |                   | 1.00                           |                   |
| 70-74                                                                                                                                                                          | 0.81 (0.66 – 0.99)             | <b>0.04</b> | 0.56 (0.45 – 0.70)                  | <b>&lt;0.0001</b> | 1.11 (0.90 – 1.38)             | 0.33              |
| <b>Health Perception</b>                                                                                                                                                       |                                |             |                                     |                   |                                |                   |
| Fair/Poor (ref)                                                                                                                                                                | 1.00                           |             | 1.00                                |                   | 1.00                           |                   |
| Good/Very Good/Excellent                                                                                                                                                       | 0.80 (0.62 – 1.03)             | 0.08        | 0.80 (0.61 – 1.05)                  | 0.11              | 0.82 (0.63 – 1.06)             | 0.13              |
| <b>Co-morbidities</b>                                                                                                                                                          |                                |             |                                     |                   |                                |                   |
| < 3 (ref)                                                                                                                                                                      | 1.00                           |             | 1.00                                |                   | 1.00                           |                   |
| ≥ 3                                                                                                                                                                            | 1.14 (0.92 – 1.40)             | 0.24        | 0.99 (0.79 – 1.24)                  | 0.94              | 1.39 (1.11 – 1.73)             | <b>0.004</b>      |
| <b>Level of Health Literacy</b>                                                                                                                                                |                                |             |                                     |                   |                                |                   |
| Low (ref)                                                                                                                                                                      | 1.00                           |             | 1.00                                |                   | 1.00                           |                   |
| Adequate                                                                                                                                                                       | 1.18 (0.95 – 1.45)             | 0.13        | 1.29 (1.02– 1.62)                   | <b>0.03</b>       | 0.94 (0.76 – 1.18)             | 0.62              |

Abbreviations: CI, confidence interval; PEM, printed educational materials only; NAV; CRC, colorectal cancer; Ref, reference group  
<sup>a</sup>Odds ratios (OR) and 95 % CIs were calculated using weighted multiple logistic regression models adjusted for variables in the table and baseline screening status.
